# Supplementary material for: Cu2−xS nanocrystal synthesis: a chemical toolbox for controlling nanocrystal geometry, phase and plasmonic behavior
Source: Royal Society of Chemistry journal article supplement (doi:10.1039/d0qm00596g), 2020-10-23
Supplement: d0qm00596g1.pdf [file d0qm00596g1.pdf]

## Electronic Supplementary Materials

### **Cu<sub>2-x</sub>S nanocrystals synthesis: a chemical toolbox for controlling nanocrystal geometry, phase and plasmonic behavior**

Mariangela Giancaspro<sup>a, b</sup>, Teresa Sibillano<sup>c</sup>, Francesca Panzarea<sup>a</sup>, Cinzia Giannini<sup>c</sup>, Silvia Schmitzer<sup>a</sup>, Fabio Vischio<sup>a, d</sup>, Nicoletta Depalo<sup>d</sup>, Angela Agostiano<sup>a, d</sup>, M. Lucia Curri<sup>a, b, d</sup>, Marinella Striccoli<sup>d</sup>, Elisabetta Fanizza<sup>a, d\*</sup>

<sup>a</sup>Chemistry Department, Università degli Studi di Bari, Via Orabona 4, 70126 Bari, Italy

<sup>b</sup>National Interuniversity Consortium of Materials Science and Technology (INSTM), Bari, Italy

<sup>c</sup>CNR-Istituto di Cristallografia (CNR-IC), Via Amendola, 122/O, 70126 Bari, Italy

<sup>d</sup>CNR-Istituto per i Processi chimico Fisici (CNR-IPCF), SS Bari, Via Orabona 4, 70126 Bari, Italy

\* Corresponding Author: [elisabetta.fanizza@uniba.it](mailto:elisabetta.fanizza@uniba.it).

| Sample | CuCl: OA: Olam : ODE<br>(mmol) | CuCl <sub>2</sub> : OA : Olam : ODE<br>(mmol) | Cu(AcO) <sub>2</sub> : OA: Olam : ODE<br>(mmol) | Cu(AcA) <sub>2</sub> : OA: Olam : ODE<br>(mmol) | S : OA: Olam : ODE<br>(mmol) |
|--------|--------------------------------|-----------------------------------------------|-------------------------------------------------|-------------------------------------------------|------------------------------|
| NP 1   | 0.5 : 5 : 10 : 20              |                                               |                                                 |                                                 | 0.5 : 4 : 0 : 4              |
| NP 2   |                                | 0.5 : 5 : 10 : 20                             |                                                 |                                                 | 0.5 : 4 : 0 : 4              |
| NP 3   |                                |                                               | 0.5 : 5 : 10 : 20                               |                                                 | 0.5 : 4 : 4                  |
| NP 4   |                                |                                               |                                                 | 0.5 : 5 : 10 : 20                               | 0.5 : 4 : 4                  |
| NP 5   | 0.5 : 0 : 10 : 20              |                                               |                                                 |                                                 | 0.5 : 0 : 4 : 4              |
| NP 6   |                                | 0.5 : 0 : 10 : 20                             |                                                 |                                                 | 0.5 : 0 : 4 : 4              |
| NP 7   | 0.5 : 0 : 10 : 20              |                                               |                                                 |                                                 | 1 : 0 : 8 : 8                |
| NP 8   | 0.5 : 0 : 10 : 20              |                                               |                                                 |                                                 | 2.5 : 0 : 8 : 8              |
| NP 9   |                                | 0.5 : 0 : 10 : 20                             |                                                 |                                                 | 1 : 0 : 8 : 8                |
| NP 10  |                                | 0.5 : 0 : 10 : 20                             |                                                 |                                                 | 2.5 : 0 : 8 : 8              |

Table S1. Reaction mixture composition used for the synthesis of NP1-NP10 samples, according to a two-pots approach. Oleic Acid (OA), Oleyl amine (Olam), Octadecene (ODE), copper (II) acetylacetonate (Cu(AcAc)<sub>2</sub>), copper (II) acetate (Cu(AcO)<sub>2</sub>).

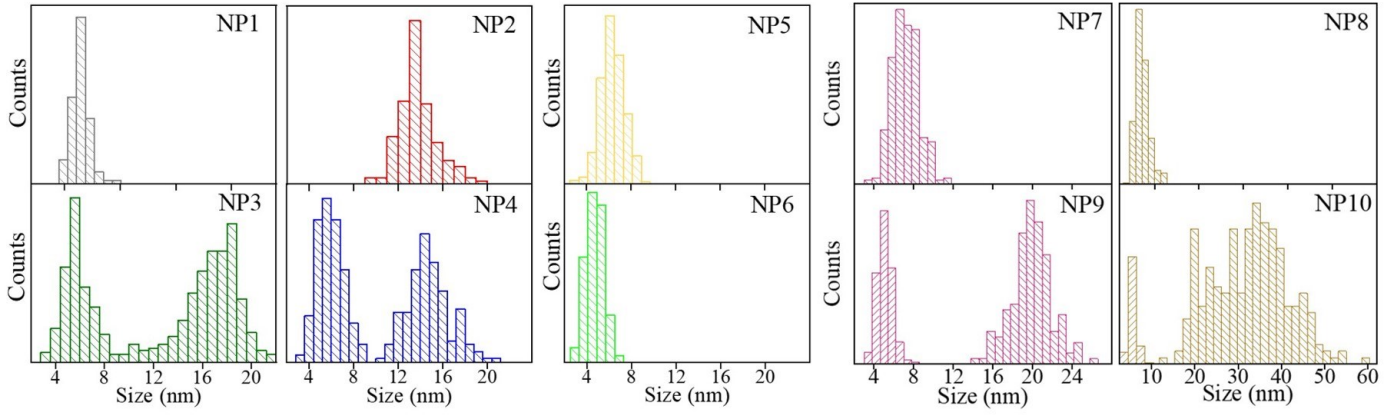

| Sample | $\gamma$ (Hz)/ $10^{14}$ | $\omega_{sp}$ (eV) | $\omega_p$ (eV) | $N_h$ ( $cm^{-3}$ )/ $10^{21}$ | $Cu_{2-x}S$  |
|--------|--------------------------|--------------------|-----------------|--------------------------------|--------------|
| NP 1   | 1.44                     | 0.99               | 2.73            | 4.22                           | $Cu_{1.80}S$ |
| NP 2   | 1.63                     | 0.92               | 2.69            | 4.12                           | $Cu_{1.81}S$ |
| NP 3   | 1.60                     | 0.88               | 2.60            | 3.83                           | $Cu_{1.82}S$ |
| NP 4   | 1.60                     | 0.93               | 2.69            | 4.09                           | $Cu_{1.81}S$ |
| NP 5   | 1.60                     | 1.01               | 2.84            | 4.58                           | $Cu_{1.78}S$ |
| NP 6   | 1.60                     | 1.19               | 3.21            | 5.86                           | $Cu_{1.72}S$ |
| NP 7   | 1.60                     | 1.05               | 2.92            | 4.85                           | $Cu_{1.77}S$ |
| NP 8   | 1.60                     | 1.08               | 2.98            | 5.04                           | $Cu_{1.76}S$ |
| NP 9   | 1.60                     | 1.02               | 2.86            | 4.65                           | $Cu_{1.78}S$ |
| NP 10  | 1.60                     | 0.95               | 2.73            | 4.24                           | $Cu_{1.80}S$ |

Figure S1. Upper panels. Statistical analysis of the size distribution of the  $Cu_{2-x}S$  NP1-NP10 samples as measured from the TEM micrographs reported in Figure 1 and Figure 4 in the main manuscript.

Table (bottom panel) of the  $Cu_{2-x}S$  NP1- NP10 sample plasmonic properties:  $\gamma$  full width at half maximum of the localized surface plasmon band,  $\omega_{sp}$  localized surface plasmon band position,  $\omega_p$  bulk plasmon band,  $N_h$ , hole carrier density, and final stoichiometry of the as-synthesized nanoparticles as measured from the UV-Vis-NIR absorption spectra in Figure 3h and Figure 4e-f in the main manuscript and theoretically determined from the following equations adopting the Mie Theory

$$\omega_p = \sqrt{(\omega_{sp}^2 + \gamma^2)(1 + 2\epsilon_m)}$$

$$N_h = \frac{\epsilon_0 m_h \omega_p^2}{10^6 e^2}$$

$$Cu_{0\%} = 50 \frac{N_h PM_{Cu_2S}}{\rho N_A}$$

$$Cu_{2-x} = \frac{100 - Cu_{0\%}}{50}$$

where  $\epsilon_m$  is the dielectric constant of the solvent,  $e$  is the electron charge,  $\epsilon_0$  is the free space permittivity,  $m_h$  is the hole effective mass (nearly  $0.8m_0$ ), and  $\rho$  is  $Cu_2S$  density equal to  $\rho = 5.6 \text{ g/cm}^3$

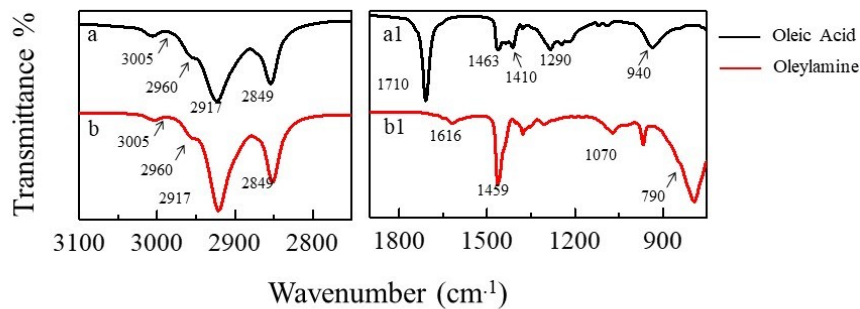

Figure S2. FTIR spectra in ATR mode of Oleic Acid (a, a1, black line) and Oleylamine (b, b1, red line)

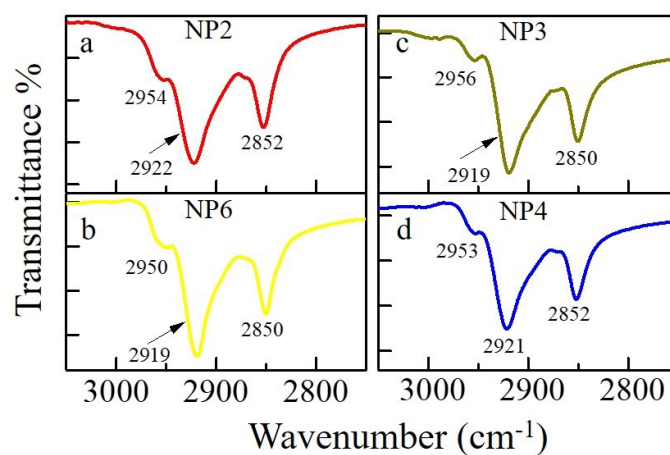

Figure S3. FTIR spectra in ATR mode (3050 - 2750  $\text{cm}^{-1}$  range) of (a) NP2, (b) NP6 (c) NP3, (d) NP 4. See Table S1 for reaction mixture composition.

| Vibrational modes                                                    | NP2  | NP3  | NP4  | NP6  | Olam | OA   |
|----------------------------------------------------------------------|------|------|------|------|------|------|
| $\nu_{\text{CH}} (-\text{CH}=\text{CH}-)$                            |      |      |      |      | 3006 | 3006 |
| $\nu_{\text{AS}} \text{CH}_3$                                        | 2954 | 2956 | 2953 | 2950 | 2960 | 2960 |
| $\nu_{\text{AS}} \text{CH}_2$                                        | 2922 | 2919 | 2921 | 2919 | 2917 | 2917 |
| $\nu_{\text{S}} \text{CH}_2$                                         | 2852 | 2850 | 2852 | 2850 | 2849 | 2849 |
| $\nu \text{C}=\text{O}$                                              | 1736 | 1734 | 1736 | 1730 |      | 1710 |
| $\nu \text{C}=\text{C}$                                              | 1648 | 1650 | 1648 | 1650 | 1653 | 1653 |
| $\nu_{\text{AS}} \text{NH}_3^+$                                      |      |      |      |      |      |      |
| $\delta \text{NH}_2$ (scissoring)                                    |      |      |      | 1624 | 1616 |      |
| $\nu_{\text{AS}} -(\text{CO})_2$                                     | 1550 | 1553 |      |      |      |      |
| $\delta_{\text{S}} \text{CH}_2$ and $\delta_{\text{AS}} \text{CH}_3$ | 1461 | 1460 | 1461 | 1461 | 1459 | 1459 |
| $\nu_{\text{S}} -(\text{CO})_2$                                      | 1403 | 1408 |      | 1404 |      |      |
| $\delta_{\text{S}} \text{CH}_3$                                      | 1371 | 1367 | 1371 | 1371 | 1379 | 1379 |
| $\nu \text{C}-\text{O}$                                              | 1257 | 1260 | 1256 |      |      | 1246 |
| Wagging $\text{CH}_2$                                                | 1185 | 1174 |      | 1185 |      |      |
| $\nu \text{C}-\text{C}-\text{O}$                                     | 1100 | 1080 |      | 1113 | 1145 | 1090 |
| $\delta \text{C}-\text{N}$                                           | 1056 |      |      | 1056 | 1070 |      |
| $\delta =\text{C}-\text{H}$ out of plane                             | 1013 | 1018 |      | 1013 |      |      |

Table S2. Table with the assessments of all the characteristic vibration modes as detected from the FTIR-ATR spectra reported in Figure 3a-d in the main manuscript. Oleic Acid (OA), Oleyl amine (Olam).

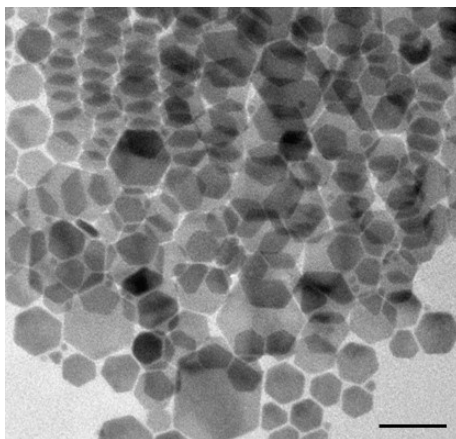

S4. TEM micrograph of  $\text{Cu}_{2-x}\text{S}$  NP9 sample after 40 minutes of reaction. Scale bar 50 nm

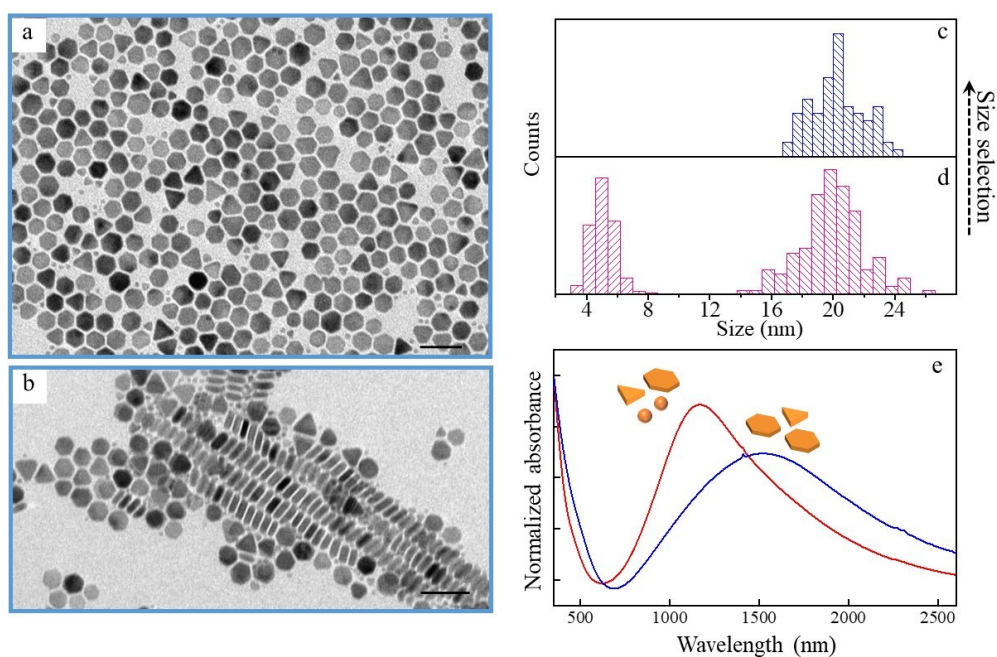

Figure S5. Size selective precipitation of NP9 by purposely adding ethanol in volumetric ration with reaction mixture of 6:1. TEM micrographs of the size selected sample (a, b, scale bar 50nm) showing monodispersed hexagonal and triangular nanoplates (NPLs). Statistical analysis (c, d) and UV-Vis-NIR absorbance spectra (e) of  $\text{Cu}_{2-x}\text{S}$  NP9 sample before (d, e red line) and after (c, e blue line) size selection.

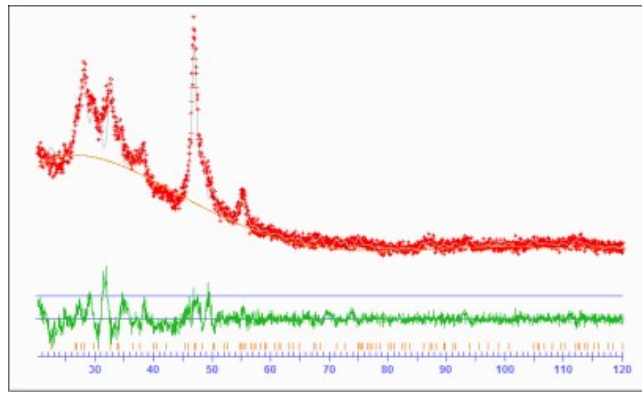

Figure S6. Rietveld fit of the XRD pattern collected on the NP1 sample (black line in Figure 3 of main test)

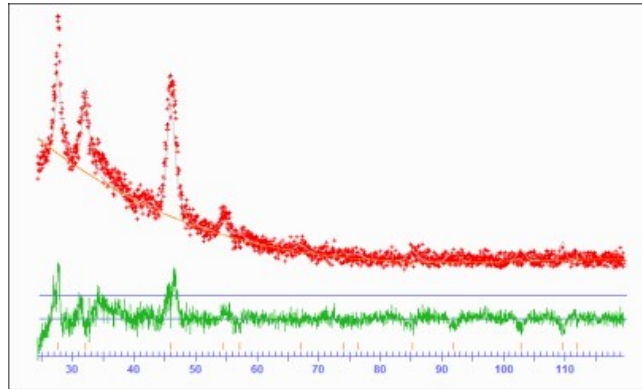

Figure S7. Rietveld fit of the XRD pattern collected on the NP4 sample (blue line in Figure 3 of main test)

| Sample | $\text{CuCl}_2$ : Olam : ODE<br>(mmol) | $\text{CuCl}_2$ : Olam : ODE<br>(mmol) | tDT<br>(mmol) | DBDS<br>(mmol) |
|--------|----------------------------------------|----------------------------------------|---------------|----------------|
| NP 11  | 0.5 : 10 : 20                          |                                        | 8             |                |
| NP 12  |                                        | 0.5 : 10 : 20                          | 8             |                |
| NP 13  |                                        | 0.5 : 10 : 20                          |               | 8              |

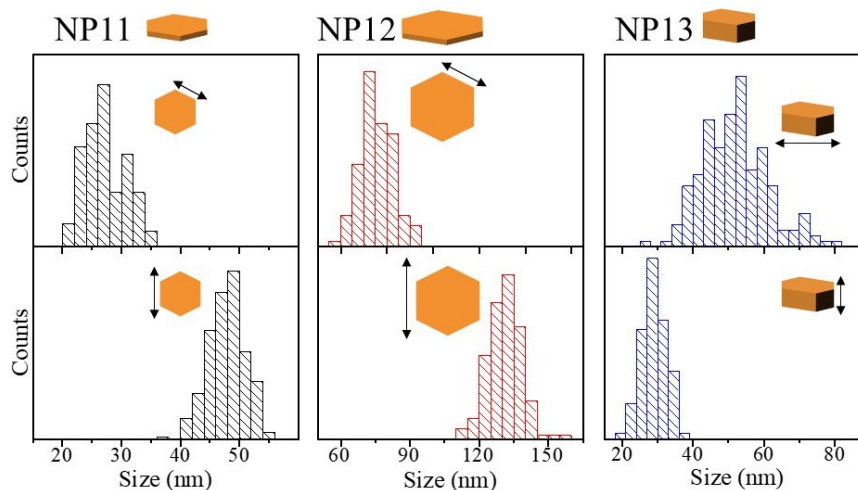

Figure S8. Upper table. Reaction mixture composition used for the synthesis of NP11-NP13 samples according to the one-pot approach (Oleyl amine (Olam), Octadecene (ODE), tert-dodecanthiol(tDT), dibutylidisulfide (DBDS)) Bottom panel. Statistical analysis of TEM micrographs reported in Figure 5 in the main manuscript. Edge length and average size of 27 nm ( $\sigma_{\%}=16\%$ ) and 48 nm ( $\sigma_{\%}=7\%$ ) for NP11, 76 nm ( $\sigma_{\%}=10\%$ ) and 131 nm ( $\sigma_{\%}=6\%$ ), for NP12 prepared with  $\text{CuCl}_2$ , and lateral size of 52 nm ( $\sigma_{\%}=18\%$ ) and thickness of 29 nm ( $\sigma_{\%}=12\%$ ) for NP13.

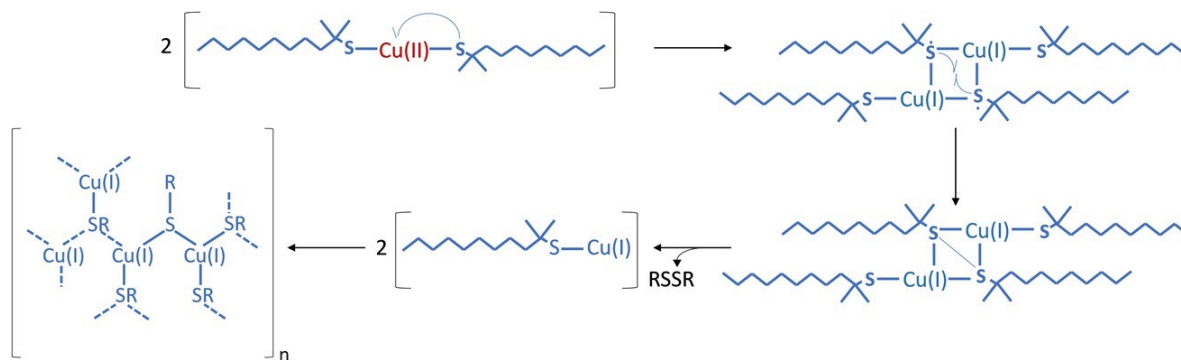

Scheme S1. Proposed mechanism for the tert-dodecanthiol induced reduction of Cu(II) to Cu(I). Scheme adapted from reference 65 [Kreitman, G.Y., et al., *Reaction Mechanisms of Metals with Hydrogen Sulfide and Thiols in Model Wine. Part 1: Copper-Catalyzed Oxidation*. Journal of Agricultural and Food Chemistry, 2016. **64**(20): p. 4095-4104]

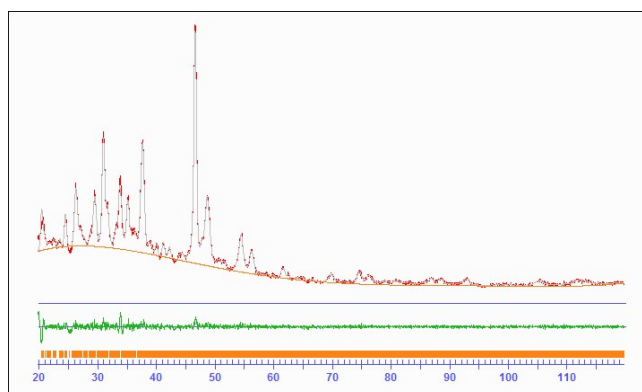

Figure S9. Rietveld fit of the XRD pattern collected on the NP12 sample (red line in Figure 5 of main test)
